# Supplementary material
Source: Springer Nature journal article supplement (https://www.springermedizin.de/resource/supplementary/12968_2010_1455_MOESM6_ESM.pdf/9581202)

**TOF Repair**

↑ Pulmonary regurgitation

PA dilation  
(↑ capacitance)

↑ PA pulse  
pressure/volume

RV dilatation

↑ RV compliance

↑ Pulmonary regurgitation

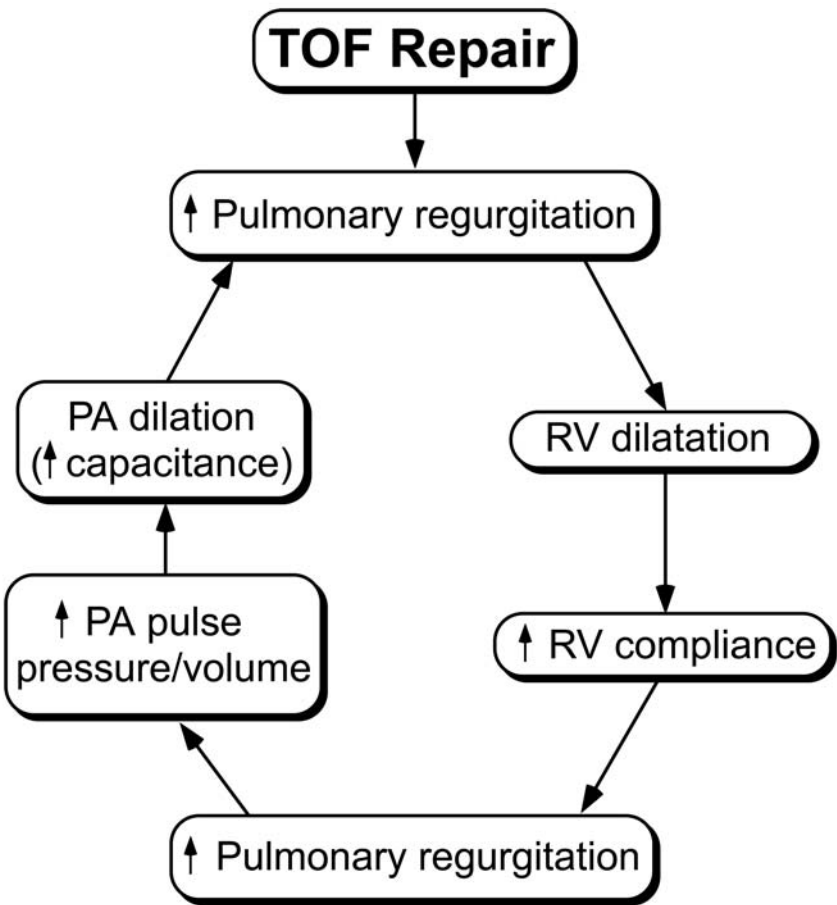

Supplement: MOESM6 [file 9581202]
